# Supplementary material
Source: PubMed Central journal article supplement (PMC5839119)
Supplement: NIHMS923448-supplement-213_2017_4791_MOESM2_ESM.pdf [file NIHMS923448-supplement-213_2017_4791_MOESM2_ESM.pdf]

Online Resource 2

Article title: Sex Differences in the Association of Alcohol with Cognitive Decline and Brain Pathology in a Cohort of Octogenarians

Journal name: Psychopharmacology

Author names: Casia Wardzala, Charles Murchison M.S., Jennifer M. Loftis Ph.D., Katie J. Schenning M.D., Nora Mattek M.P.H., Randall Woltjer M.D., Ph.D., Jeff Kaye M.D., Joseph F. Quinn M.D., Clare J. Wilhelm Ph.D.

Affiliation and e-mail address of the corresponding author:

Clare Wilhelm, Ph.D.

VA Portland Health Care System

3710 SW US Veterans Hospital Rd. (R&D 17)

Portland, OR 97239

503-220-8262 x58020

[wilhelmc@ohsu.edu](mailto:wilhelmc@ohsu.edu)

Description: The questionnaire used to collect current and previous alcohol use.

**Alcohol Use**

Does the patient currently drink alcohol regularly? Yes\_\_\_\_\_

No\_\_\_\_\_

Don't know\_\_\_\_\_

If no, but the patient drank alcohol regularly in the past, at what age did he/she quit? \_\_\_\_\_

Has the patient ever consumed more than one drink per week regularly for more than 3 months?

**(1 drink = 12 oz beer, 8 oz. Wine, 1.5 oz. Distilled liquor )**

Yes\_\_\_\_\_

No\_\_\_\_\_

Don't know\_\_\_\_\_

| Age        | avg. frequency<br>(days/week) | avg. quantity<br>(drinks/day) | avg. frequency of<br>4 or more drinks/occasion | type of drink<br>(in percentage) |
|------------|-------------------------------|-------------------------------|------------------------------------------------|----------------------------------|
| 0-18       | ___ 1-2 days/wk               | ___ 1/day                     | ___ rarely or never                            | ___ % beer                       |
|            | ___ 3-5 days/wk               | ___ 2-3/day                   | ___ 1-2 days/month                             | ___ % wine                       |
|            | ___ daily                     | ___ 4 or more/day             | ___ 3-4 days/month                             | ___ % liquor                     |
|            |                               |                               | ___ 5 or more days/month                       |                                  |
| 19-39      | ___ 1-2 days/wk               | ___ 1/day                     | ___ rarely or never                            | ___ % beer                       |
|            | ___ 3-5 days/wk               | ___ 2-3/day                   | ___ 1-2 days/month                             | ___ % wine                       |
|            | ___ daily                     | ___ 4 or more/day             | ___ 3-4 days/month                             | ___ % liquor                     |
|            |                               |                               | ___ 5 or more days/month                       |                                  |
| 40-present | ___ 1-2 days/wk               | ___ 1/day                     | ___ rarely or never                            | ___ % beer                       |
|            | ___ 3-5 days/wk               | ___ 2-3/day                   | ___ 1-2 days/month                             | ___ % wine                       |
|            | ___ daily                     | ___ 4 or more/day             | ___ 3-4 days/month                             | ___ % liquor                     |
|            |                               |                               | ___ 5 or more days/month                       |                                  |

If yes, complete the following chart. If you don't know the details check here .

Has the patient had any of the following as a result of alcohol use:

seizures: Yes\_\_\_\_\_ delirium tremors (DT): Yes\_\_\_\_\_ liver trouble: Yes\_\_\_\_\_

bleeding ulcer: Yes\_\_\_\_\_

No\_\_\_\_\_ No\_\_\_\_\_ No\_\_\_\_\_ No\_\_\_\_\_

Don't know\_\_\_\_\_ Don't know\_\_\_\_\_ Don't know\_\_\_\_\_ Don't know\_\_\_\_\_

Has the patient ever had any of the following problems because of alcohol:

social, marital or work problem: Yes\_\_\_\_\_ problems with aggressive behavior (fighting): Yes

traffic violation: Yes\_\_\_\_\_

No\_\_\_\_\_ No\_\_\_\_\_ No\_\_\_\_\_

Don't know\_\_\_\_\_ Don't know\_\_\_\_\_ Don't know\_\_\_\_\_
